# Supplementary material for: Eisenia bicyclis Extract Repairs UVB-Induced Skin Photoaging In Vitro and In Vivo: Photoprotective Effects
Source: MDPI journal article supplement (doi:10.3390/md19120693), 2021-12-03
Supplement: s1 [file s1]

## Supplementary Data

**Table S1.** Primer sequences

| Type  | Gene Description                                 | Sequences (5' → 3')                                          |
|-------|--------------------------------------------------|--------------------------------------------------------------|
| Human | Filaggrin                                        | F : AGTGCACTCAGGGGGCTCACA<br>R : CCGGCTTGGCCGTAATGTGT        |
|       | Involucrin                                       | F : TTGGTCAGTGAAGCGATGAG<br>R : AGATCTGTCTGCAGGGCTGT         |
|       | Loricrin                                         | F : GGCTGCATCTAGTTCTGCTGTTTA<br>R : CAAATTTATTGACTGAGGCACTGG |
|       | Glyceraldehyde 3-phosphate dehydrogenase (GAPDH) | F : ATCAAGTGGGGCGAT GCTG<br>R : ACCCATGACGAACATGGGG          |
|       |                                                  |                                                              |

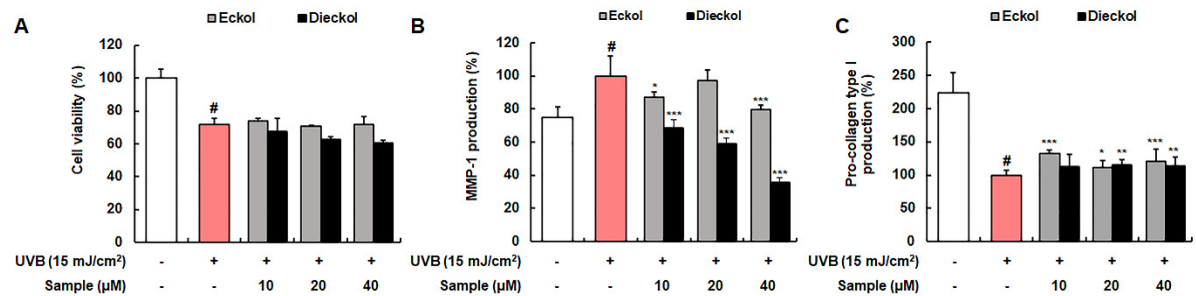

**Figure S1.** Effects of eckol and dieckol on cell viability and productions of matrix metalloproteinases-1 (MMP-1) and pro-collagen type I in UVB-irradiated Hs68 cells. Cells were irradiated by UVB and then treated with various concentrations of eckol and dieckol (10, 20, and 40 μM). **(A)** The cell viability was analyzed by using the 3-(4,5-dimethylthiazol-2-yl)-2,5-diphenyl tetrazolium bromide (MTT) assay. **(B, C)** The MMP-1 and pro-collagen type I levels in the cell culture media were analyzed by using ELISA kits. Values are represented as the mean ± standard deviation (SD). <sup>#</sup>*p* < 0.05 vs. the non-UVB-irradiated control group; <sup>\*</sup>*p* < 0.05, <sup>\*\*</sup>*p* < 0.01, and <sup>\*\*\*</sup>*p* < 0.001 vs. the UVB-irradiated group.

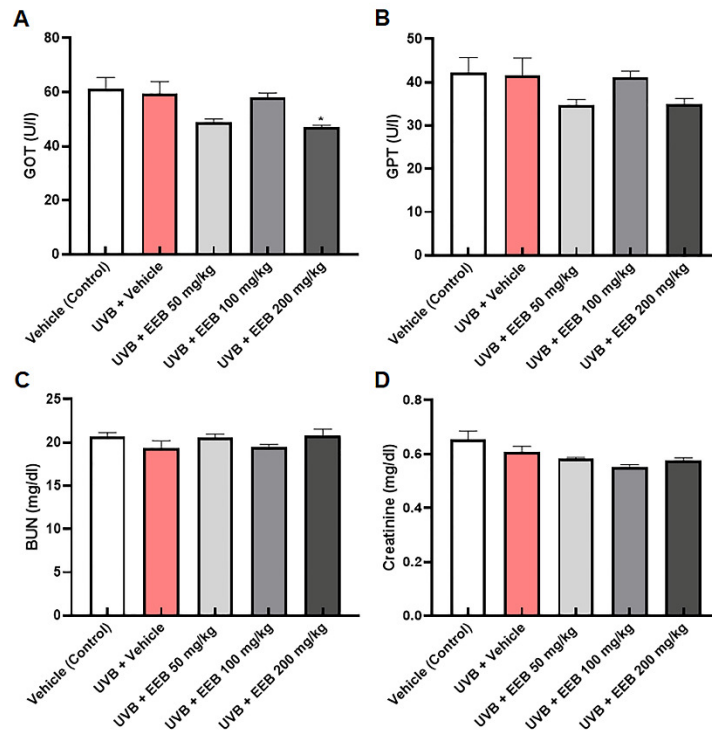

**Figure S2.** Hepatotoxicity and renal toxicity of EEB in HR-1 hairless mice. Biochemistry tests including (A) glutamic oxaloacetic transaminase (GOT, AST), (B) glutamic pyruvic transaminase (GPT, ALT), (C) blood urea nitrogen (BUN), and (D) creatinine in plasma of tested HR-1 hairless mice. Values are represented as the mean  $\pm$  SEM ( $n = 6$ ). \* $p < 0.05$  vs. the vehicle-treated control group; \* $p < 0.05$  vs. the UVB only-treated group.
